# Supplementary material for: Fabrication of Bi19S27I3 nanorod cluster films for enhanced photodetection performance
Source: Royal Society of Chemistry journal article supplement (doi:10.1039/c7dt04906d), 2018-01-01
Supplement: c7dt04906d1.pdf [file c7dt04906d1.pdf]

## Electronic Supplementary Information

### **Fabrication of Bi<sub>19</sub>S<sub>27</sub>I<sub>3</sub> nanorod cluster film for enhanced photodetection performance**

Yutao Yan, Yueling Xu, Shuijin Lei,\* Xiuling Ou, Lianfu Chen, Jinsong Xiong,

Yanhe Xiao and Baochang Cheng

*School of Materials Science and Engineering, Nanchang University, Nanchang,*

*Jiangxi 330031, P. R. China*

\*To whom correspondence should be addressed. E-mail: shjlei@ncu.edu.cn

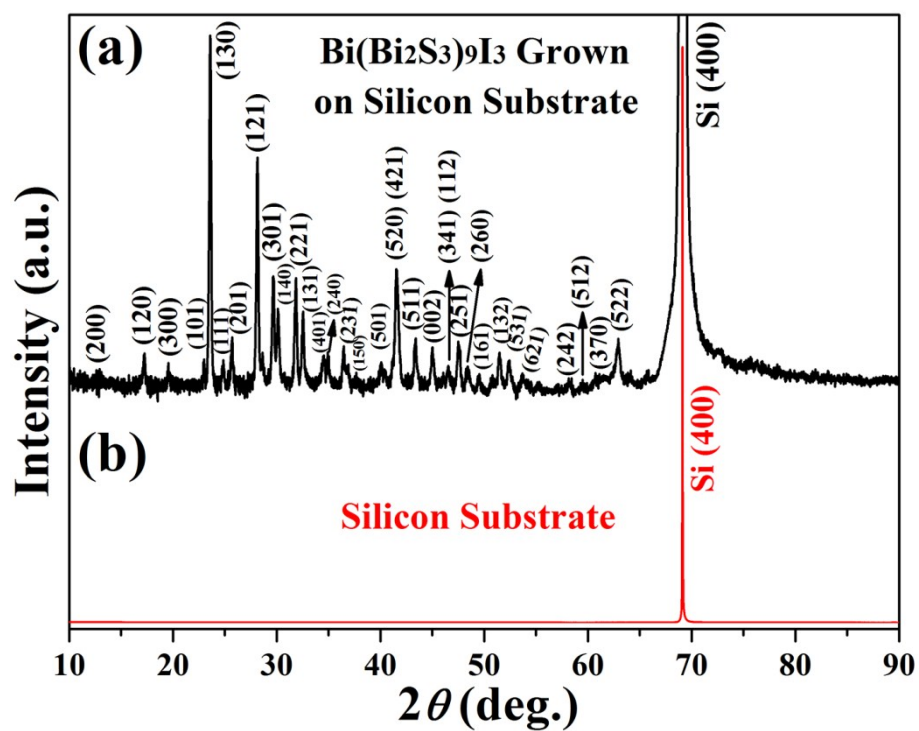

**Fig. S1** XRD patterns of (a) the prepared  $\text{Bi}_{19}\text{S}_{27}\text{I}_3$  thin film on silicon wafer and (b) the corresponding bare substrate.

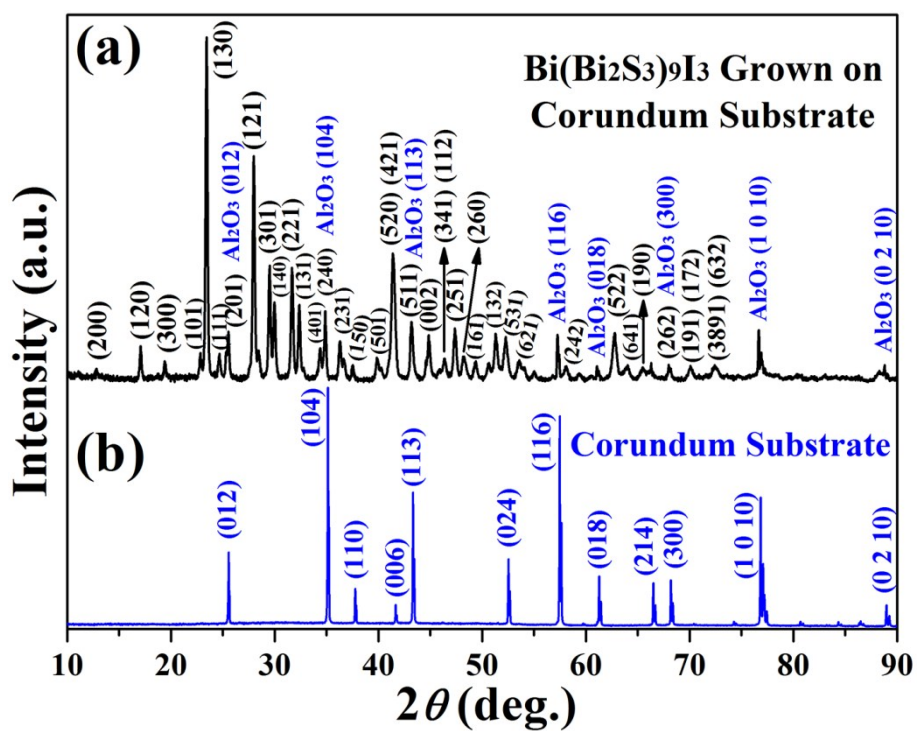

**Fig. S2** XRD patterns of (a) the prepared Bi<sub>19</sub>S<sub>27</sub>I<sub>3</sub> thin film on corundum wafer and (b) the corresponding bare substrate.

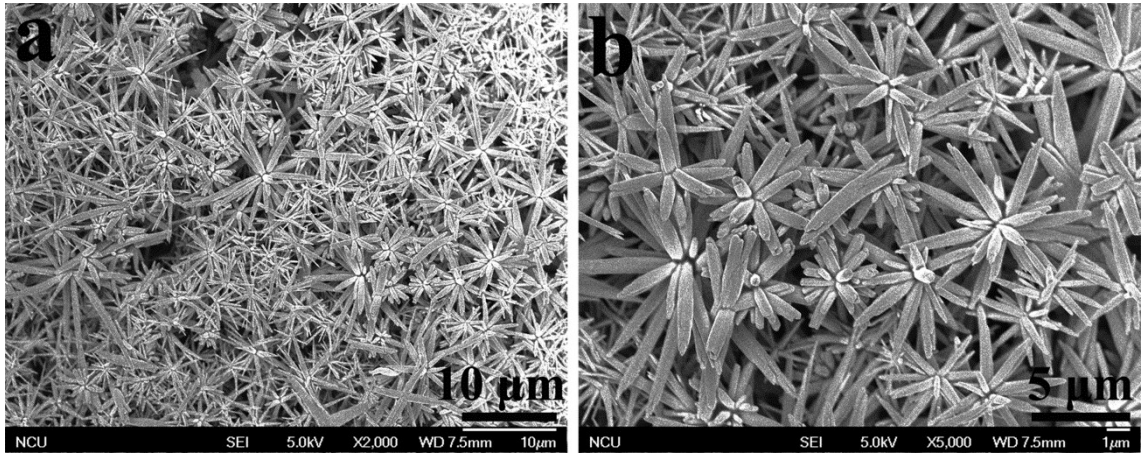

**Fig. S3** (a) Low-magnification and (b) high-magnification SEM images of the prepared  $\text{Bi}_{19}\text{S}_{27}\text{I}_3$  thin film on silicon wafer.

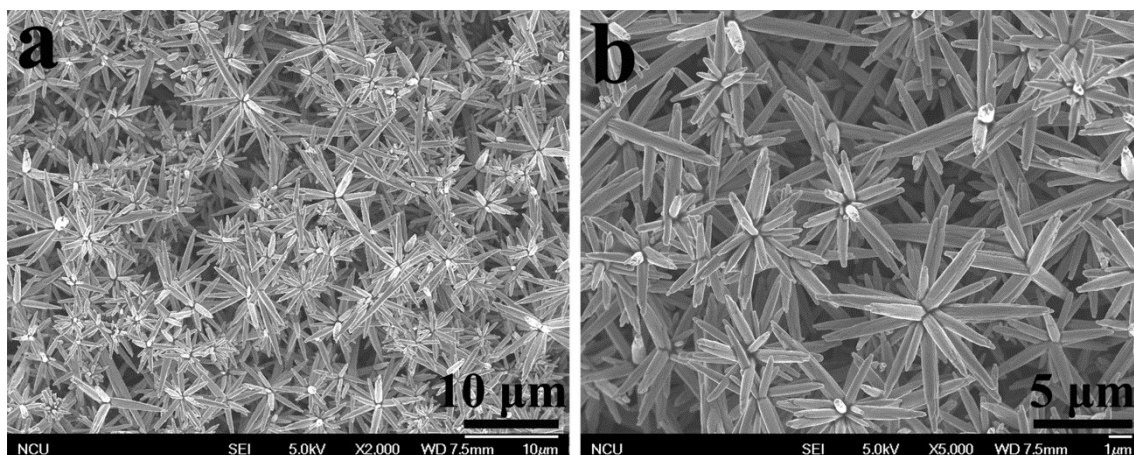

**Fig. S4** (a) Low-magnification and (b) high-magnification SEM images of the prepared  $\text{Bi}_{19}\text{S}_{27}\text{I}_3$  thin film on corundum wafer.
